# Supplementary material for: Disruption of the Schizosaccharomyces japonicus lig4 Disturbs Several Cellular Processes and Leads to a Pleiotropic Phenotype
Source: MDPI journal article supplement (doi:10.3390/jof9050550), 2023-05-10
Supplement: s1 [file s1]

| Number of the primers | Sequence (5'-3')                         | Gene                        |
|-----------------------|------------------------------------------|-----------------------------|
| 529                   | CGCAAACGTTAGAATTGCCCAG                   | <i>lig4</i>                 |
| 532                   | TGCCCGTCAAGTTTCTGCTTTG                   | <i>lig4</i>                 |
| 523                   | CGAGCATGCGTAAAACGACGGCCAGT               | KanMX6 cassette             |
| 524                   | GAAGCCGGCGCGTTAGTATCGAATCG               | KanMX6 cassette             |
| 1306                  | CGAGTCGGAAGAAGGTCA                       | SJAG_03918 5'UTR            |
| 1307                  | GTATTCTGGGCCTCCATGTCCACTCTGTTGACAACTCTGC | SJAG_03918 5'UTR            |
| 1305                  | CTGGTCGCTATACTGCTGTCGACATCATTAGCAATTCG   | SJAG_03918 3'UTR            |
| 1309                  | GAGACGGAAGGCAGCAATC                      | SJAG_03918 3'UTR            |
| 1308                  | GCAGAGTTGTCAACAGAGTGGACATGGAGGCCCAGAATAC | <i>NatMX</i> TEF promoter   |
| 1304                  | CGAATTGCTGAATGATGTGACAGCAGTATAGCGACCAG   | <i>NatMX</i> TEF terminator |
